# Supplementary material for: Trapping intermediates of the NO2 hydrolysis reaction on ice
Source: Royal Society of Chemistry journal article supplement (doi:10.1039/d4fd00161c), 2024-11-26
Supplement: d4fd00161c1.pdf [file d4fd00161c1.pdf]

Supplementary information for:

## Trapping intermediates of the NO<sub>2</sub> hydrolysis reaction on ice.

*Josée Maurais, Clément Wespiser, Raphaël Robidas, Claude Y. Legault, and Patrick Ayotte\**

Département de chimie,  
Université de Sherbrooke,  
2500 Boulevard de l'Université,  
Sherbrooke, Québec,  
CANADA J1K 2R1.

Evolution of the NO stretching vibrational frequencies for the planar and non-planar conformers of *c*-ONONO<sub>2</sub> in *c*-ONONO<sub>2</sub>·(H<sub>2</sub>O)<sub>*n*</sub> (Figure S1). Evolution of the intramolecular NO and NN bond lengths in NO<sub>2</sub>·(H<sub>2</sub>O)<sub>*n*</sub> and O<sub>2</sub>NNO<sub>2</sub>·(H<sub>2</sub>O)<sub>*n*</sub> (Figure S2), in *t*-ONONO<sub>2</sub>·(H<sub>2</sub>O)<sub>*n*</sub> (Figure S3), and in the planar and non-planar conformers of *c*-ONONO<sub>2</sub> in *c*-ONONO<sub>2</sub>·(H<sub>2</sub>O)<sub>*n*</sub> (Figure S4).

\*Patrick.Ayotte@USherbrooke.ca; 819-821-7889.

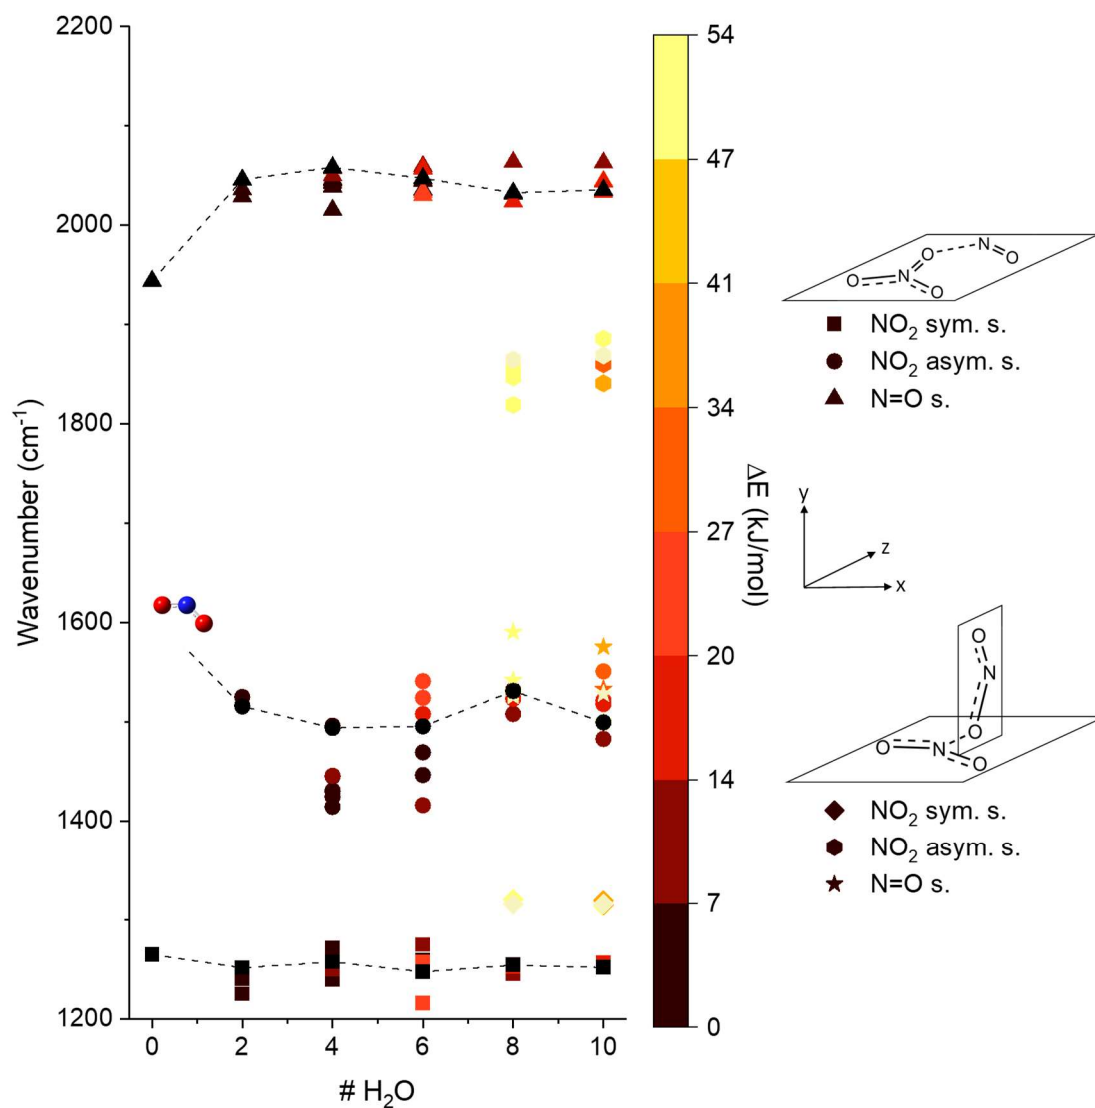

Figure S1 - (A) Vibrational frequencies for the planar and non-planar conformers of  $c\text{-ONONO}_2$  in  $c\text{-ONONO}_2 \cdot (\text{H}_2\text{O})_n$  with  $n = 0-10$ . Vibrational frequencies are calculated using B3LYP/6-311g++(3df,3dp) and are scaled by 0.976 to account for their anharmonicity.<sup>73</sup> The symmetric and asymmetric ONO stretching modes are labeled by squares and circles, respectively, while the N=O stretching modes are labeled by triangles. Symbols for the individual isomers are color-coded to account for their energy relative to the most stable isomer for each  $n$  using the scale provided as insets.

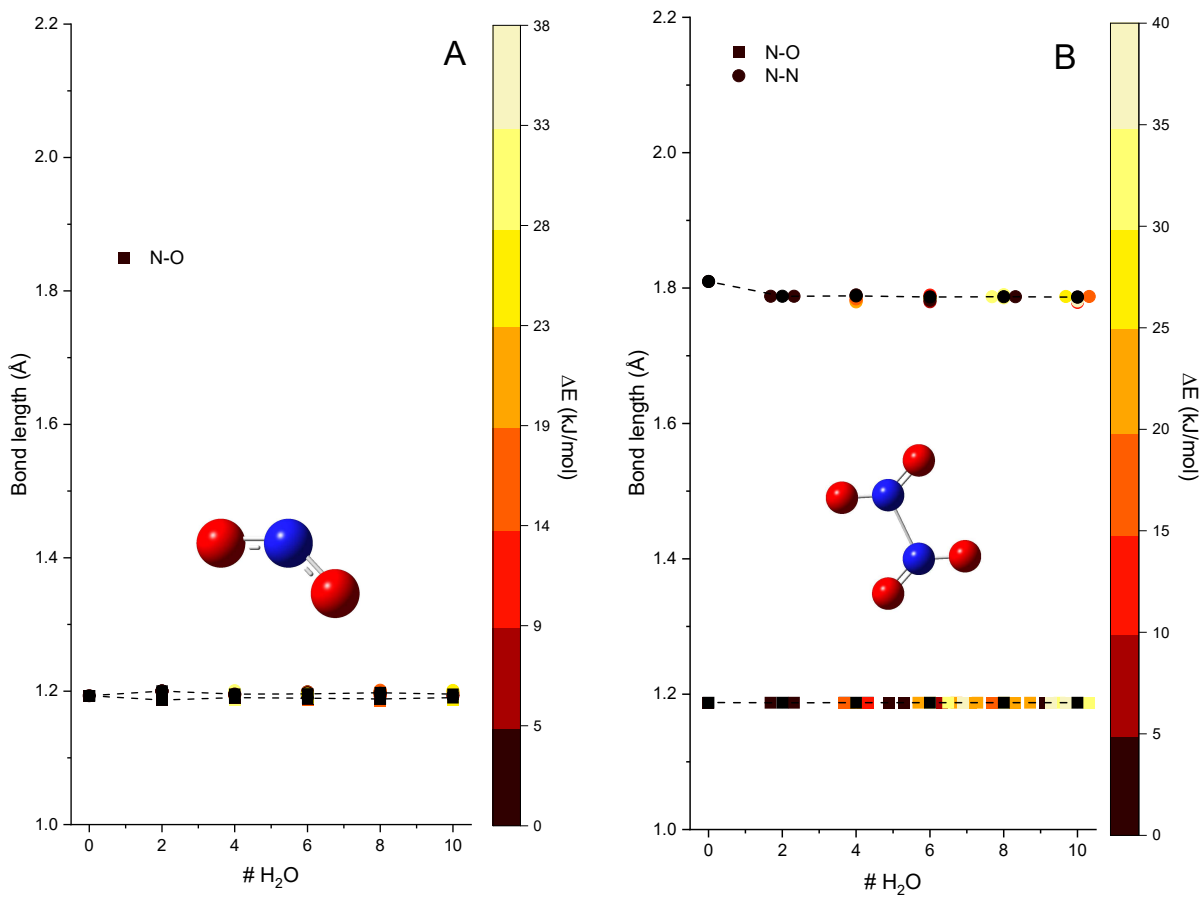

Figure S2 - (A) Intramolecular NO bond lengths for  $\text{NO}_2 \cdot (\text{H}_2\text{O})_n$  with  $n = 0-10$ ; (B) Intramolecular NO and NN bond lengths for  $\text{O}_2\text{NNO}_2 \cdot (\text{H}_2\text{O})_n$  with  $n = 0-10$ . Structures are optimized using B3LYP/6-311g++(3df,3dp). NO and NN bond lengths are labeled by squares and circles, respectively. Symbols for the individual isomers are color-coded to account for their energy relative to the most stable isomer for each  $n$  using the scale provided as insets.

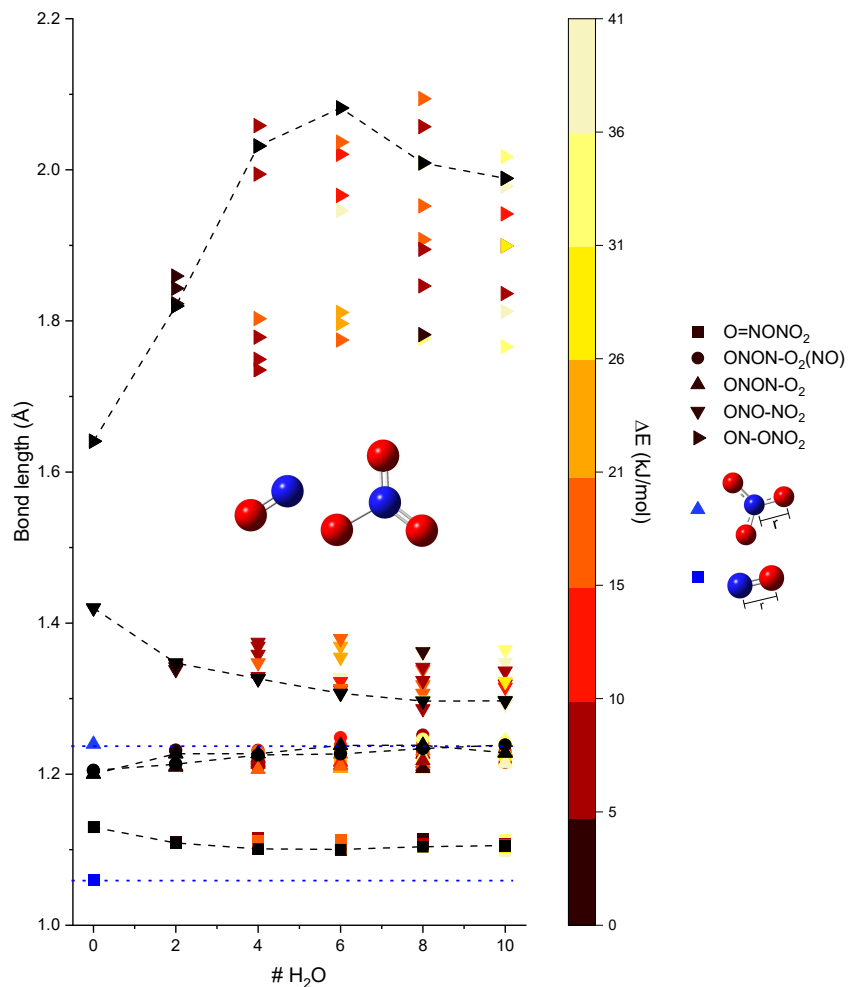

Figure S3 - Intramolecular NO bond lengths for *t*-ONONO<sub>2</sub>·(H<sub>2</sub>O)<sub>*n*</sub> with *n* = 0-10. Structures are optimized using B3LYP/6-311g++(3df,3dp). Symbols for the different NO bond lengths are defined in the legend. Symbols for the individual isomers are color-coded to account for their energy relative to the most stable isomer for each *n* using the scale provided as insets. The NO bond lengths for NO<sub>3</sub><sup>-</sup> and NO<sup>+</sup> are indicated by blue triangles and squares, respectively.

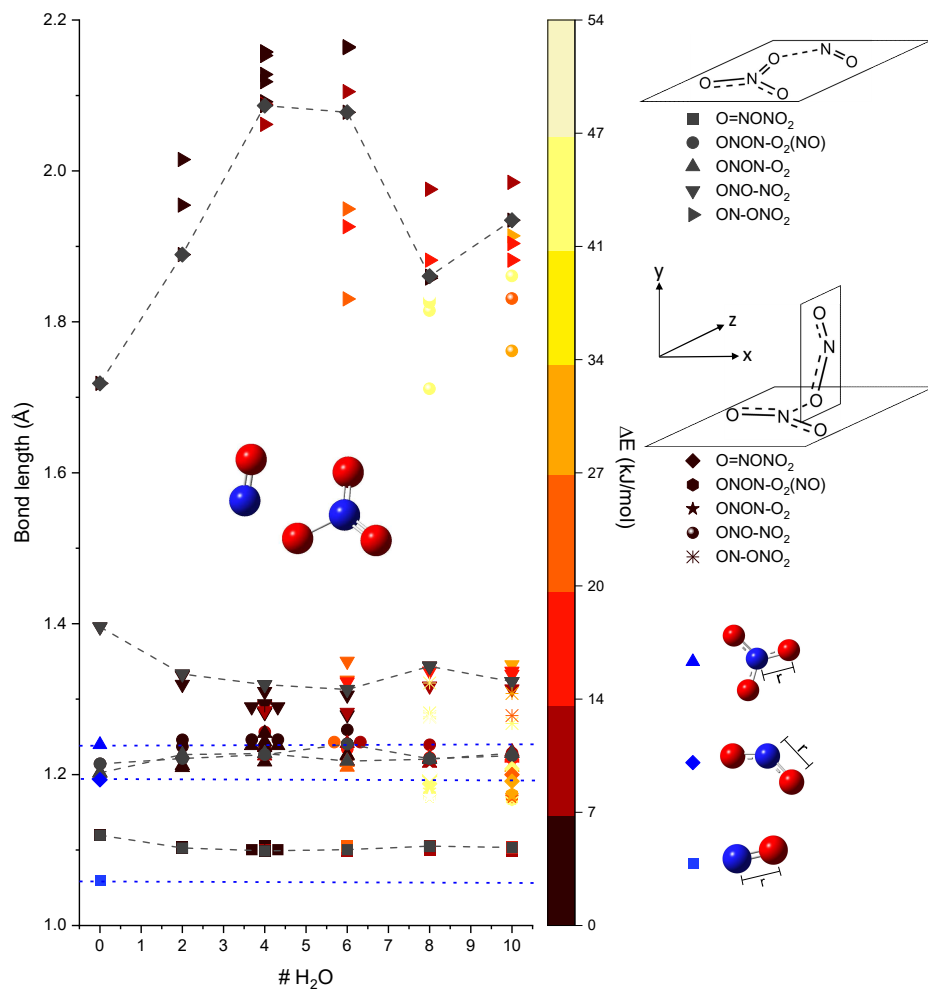

Figure S4 - Intramolecular NO bond lengths for the planar and non-planar isomers of  $c\text{-ONONO}_2 \cdot (\text{H}_2\text{O})_n$  with  $n = 0\text{-}10$ . Structures are optimized using B3LYP/6-311g++(3df,3dp). Symbols for the different NO bond lengths are defined in the legend. Symbols for the individual isomers are color-coded to account for their energy relative to the most stable isomer for each  $n$  using the scale provided as insets. The NO bond lengths for  $\text{NO}_3^-$ ,  $\text{NO}_2$ , and  $\text{NO}^+$  are indicated by blue triangles, diamonds, and squares, respectively.
